# Supplementary material
Source: PubMed Central journal article supplement (PMC6563563)
Supplement: jamadermatol-155-724-s001.pdf [file jamadermatol-155-724-s001.pdf]

## Supplementary Online Content

Freites-Martinez A, Chan D, Sibaud V, et al. Assessment of quality of life and treatment outcomes of patients with persistent postchemotherapy alopecia.

*JAMA Dermatol.* Published online March 6, 2019.

doi:10.1001/jamadermatol.2018.5071

**eFigure.** Normalized Hairdex Score Means (n = 99)

This supplementary material has been provided by the authors to give readers additional information about their work.

**eFigure.** Normalized Hairdex Score Means (n = 99)

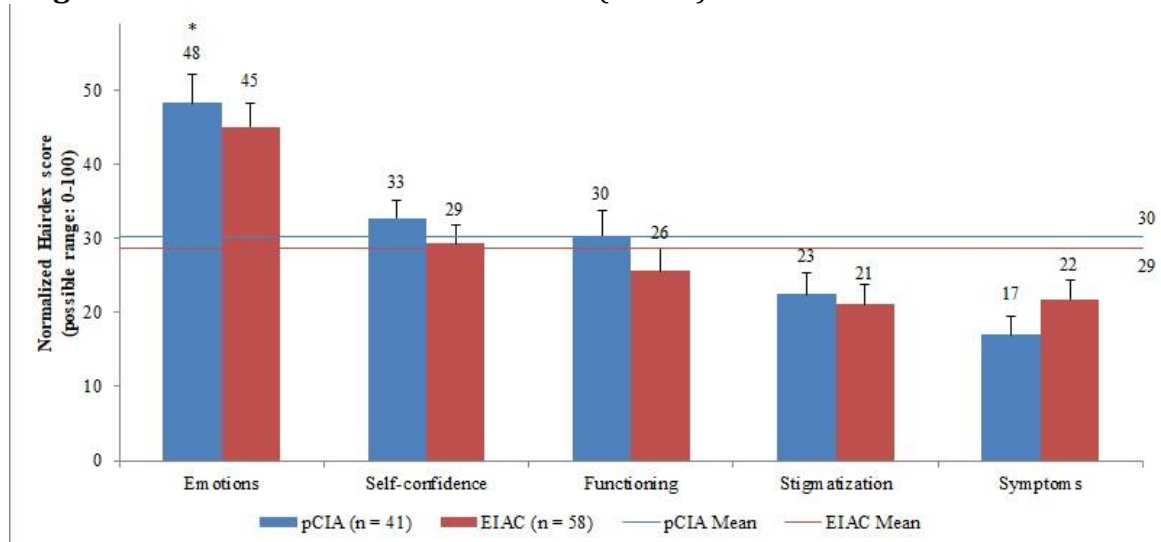

In the pCIA group, the highest negative score was emotions (48) compared to the total Hairdex score and the other domains ( $P < .008$ ). A higher score indicates worse quality of life. Error bars indicate standard error. \*pCIA patients with alopecia severity CTCAE v4.0 G2 reported greater Hairdex scores in the emotions domain (57 compared to 40 in G1 pCIA,  $P = .0291$ ). When results were controlled for age and cancer stage, the statistically significant difference in emotions score between G2 and G1 pCIA patients maintained significance ( $P < .001$ ).
